# Supplementary material for: Natural selection drives rapid evolution of mouse embryonic heart enhancers
Source: PubMed Central journal article supplement (PMC3521173; doi:10.1186/1752-0509-6-s2-s1), 2012-12-12
Supplement: 1752-0509-6-S2-S1-S1.pdf [file 1752-0509-6-S2-S1-S1.pdf]

**A**Enhancer evol. rate ( $D$ )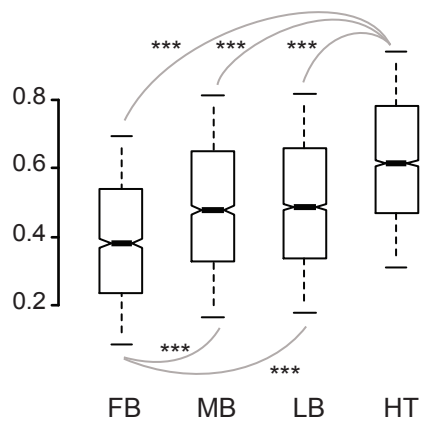**B**Normalized evol. rate ( $D/d_4$ )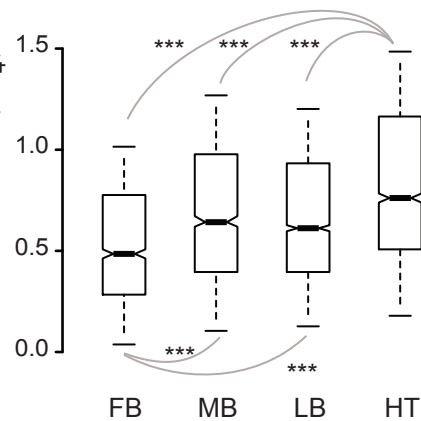**C**Normalized evol. rate ( $D/d_1$ )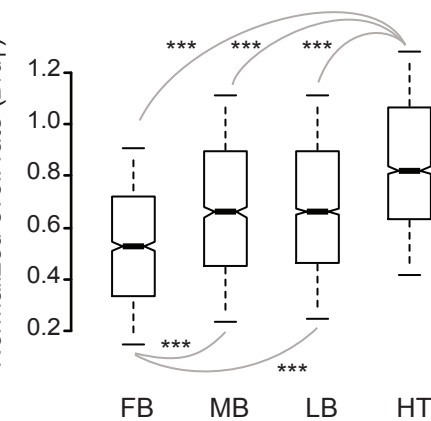**D**Neutral evol. rate ( $d_4$ )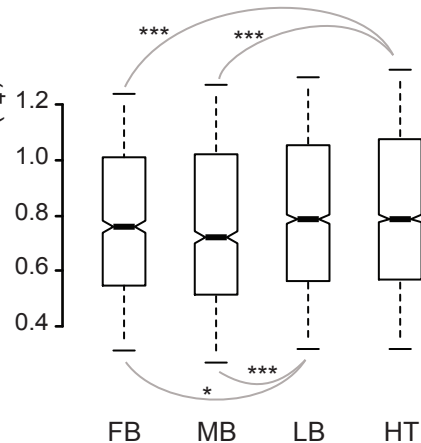**E**Neutral evol. rate ( $d_1$ )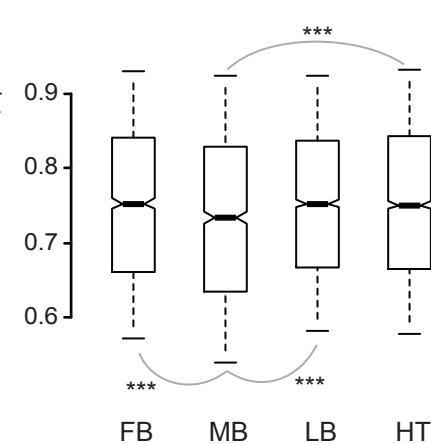

FB: forebrain  
 MB: midbrain  
 LB: limb  
 HT: heart

\*  $0.01 < P < 0.05$   
 \*\*  $0.001 < P < 0.01$   
 \*\*\*  $P < 0.001$
