# Supplementary material for: Natural selection drives rapid evolution of mouse embryonic heart enhancers
Source: PubMed Central journal article supplement (PMC3521173; doi:10.1186/1752-0509-6-s2-s1), 2012-12-12

**A**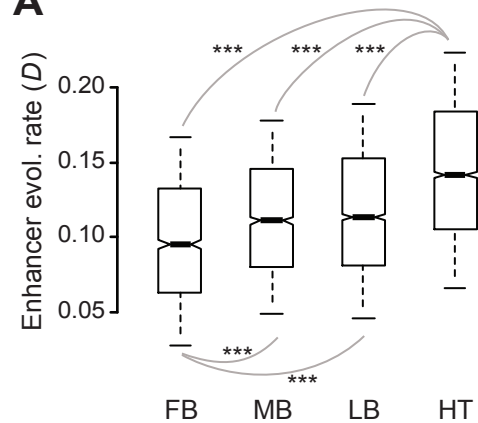**B**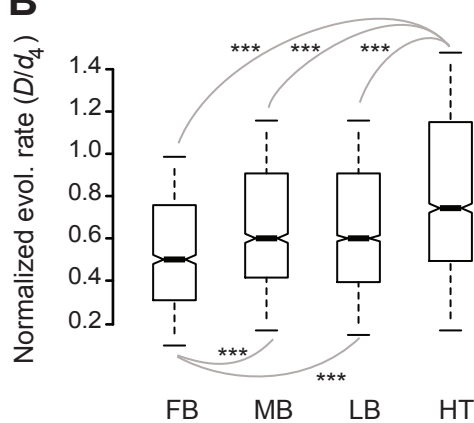**C**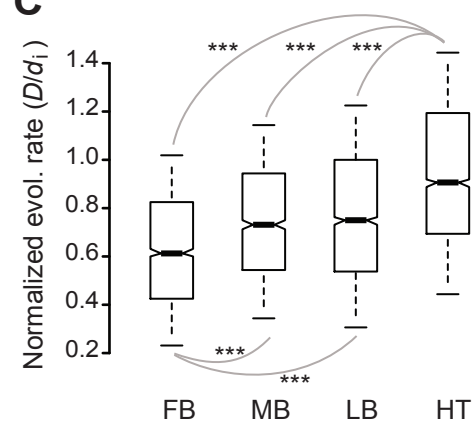

FB: forebrain  
 MB: midbrain  
 LB: limb  
 HT: heart

\*  $0.01 < P < 0.05$

\*\*  $0.001 < P < 0.01$

\*\*\*  $P < 0.001$

**D**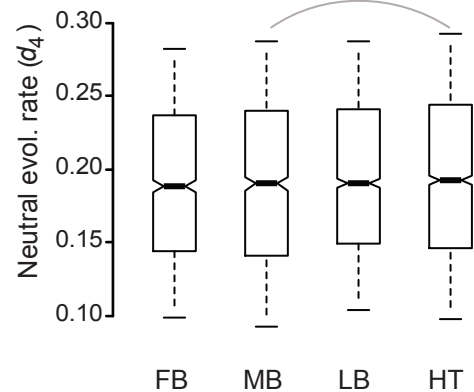**E**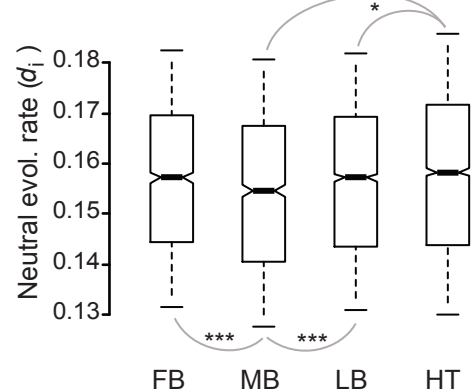

Supplement: 1752-0509-6-S2-S1-S2.pdf [file 1752-0509-6-S2-S1-S2.pdf]
