# Supplementary material for: Natural selection drives rapid evolution of mouse embryonic heart enhancers
Source: PubMed Central journal article supplement (PMC3521173; doi:10.1186/1752-0509-6-s2-s1), 2012-12-12
Supplement: 1752-0509-6-S2-S1-S3.pdf [file 1752-0509-6-S2-S1-S3.pdf]

**Table S1.** The proportions of enhancers that underwent selection based on mouse-human alignments (neutral reference: fourfold degenerate sites)

|           | <b>Total</b> | <b>Under selection<sup>a</sup></b> | <b>Positively selected<sup>b</sup></b> | <b>Under selection<sup>a</sup><br/>/Total</b> | <b>Positively selected<sup>b</sup><br/>/Under selection<sup>a</sup></b> | <b>Positively selected<sup>b</sup><br/>/Total</b> |
|-----------|--------------|------------------------------------|----------------------------------------|-----------------------------------------------|-------------------------------------------------------------------------|---------------------------------------------------|
| <b>HT</b> | 2316         | 915                                | 428                                    | 39.50%                                        | 46.77%                                                                  | 18.48%                                            |
| <b>FB</b> | 1249         | 716                                | 80                                     | 57.32%                                        | 11.17%                                                                  | 6.40%                                             |
| <b>MB</b> | 1269         | 598                                | 123                                    | 47.12%                                        | 20.56%                                                                  | 9.69%                                             |
| <b>LB</b> | 2444         | 1166                               | 282                                    | 47.70%                                        | 24.18%                                                                  | 11.53%                                            |

FB: forebrain; MB: midbrain; LB: limb; HT: heart.

<sup>a</sup> A significantly unequal proportion of substituted sites were observed between enhancers and the fourfold degenerate sites of the neighboring gene by Fisher's exact test.

<sup>b</sup> Enhancers that underwent selection and had a higher substitution rate than the fourfold degenerate sites of the neighboring gene.
