# Supplementary material for: Natural selection drives rapid evolution of mouse embryonic heart enhancers
Source: PubMed Central journal article supplement (PMC3521173; doi:10.1186/1752-0509-6-s2-s1), 2012-12-12
Supplement: 1752-0509-6-S2-S1-S4.pdf [file 1752-0509-6-S2-S1-S4.pdf]

**Table S2.** The proportions of enhancers that underwent selection based on mouse-human alignments (neutral reference: intron sites)

|           | <b>Total</b> | <b>Under selection<sup>a</sup></b> | <b>Positively selected<sup>b</sup></b> | <b>Under selection<sup>a</sup><br/>/Total</b> | <b>Positively selected<sup>b</sup><br/>/Under selection<sup>a</sup></b> | <b>Positively selected<sup>b</sup><br/>/Total</b> |
|-----------|--------------|------------------------------------|----------------------------------------|-----------------------------------------------|-------------------------------------------------------------------------|---------------------------------------------------|
| <b>HT</b> | 2273         | 946                                | 415                                    | 41.61%                                        | 43.86%                                                                  | 18.25%                                            |
| <b>FB</b> | 1183         | 724                                | 79                                     | 61.20%                                        | 10.91%                                                                  | 6.67%                                             |
| <b>MB</b> | 1186         | 656                                | 142                                    | 55.31%                                        | 21.64%                                                                  | 11.97%                                            |
| <b>LB</b> | 2368         | 1257                               | 274                                    | 53.08%                                        | 21.79%                                                                  | 11.57%                                            |

FB: forebrain; MB: midbrain; LB: limb; HT: heart.

<sup>a</sup> A significantly unequal proportion of substituted sites were observed between enhancers and the intron sites of the neighboring gene by Fisher's exact test.

<sup>b</sup> Enhancers that underwent selection and had a higher substitution rate than the intron sites of the neighboring gene.
