# Supplementary material for: Natural selection drives rapid evolution of mouse embryonic heart enhancers
Source: PubMed Central journal article supplement (PMC3521173; doi:10.1186/1752-0509-6-s2-s1), 2012-12-12

**A**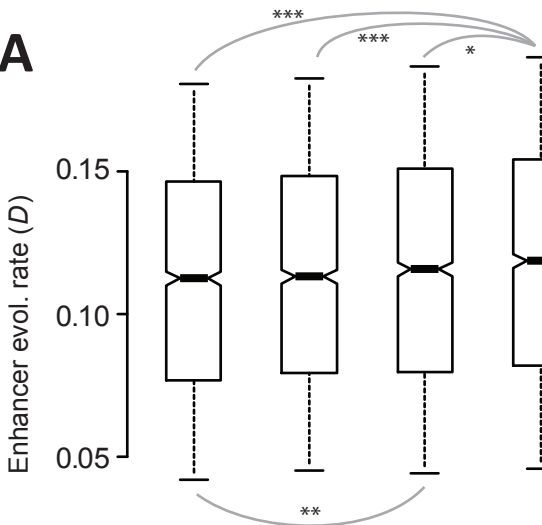**B**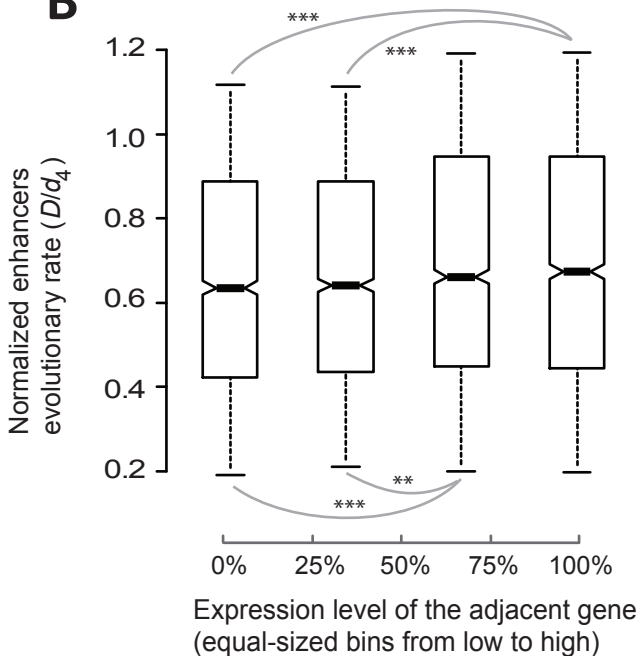

Supplement: 1752-0509-6-S2-S1-S5.pdf [file 1752-0509-6-S2-S1-S5.pdf]
